# Supplementary material for: Classification of spatial patterns of lymphocyte infiltration in gliomas from whole slide imaging
Source: Research Square preprint supplement (doi:10.21203/rs.3.rs-7631009/v1), 2025-10-15
Supplement: Supplementary file 1 [file 2922cdd7607689a8c616dd40.docx]

Supplementary table 1. Table 1.A represents the count of patches belonging to each cluster. For a given mask, the count of patches per cluster are displayed in this table. Table 1.B represents the proportion of patches per cluster for a given mask. These proportions were calculated from the count of patches (table 1.A).

(A)

| **PATCH COUNT PER IMAGE** | Cluster 1 | Cluster 2 | Cluster 3 | Cluster 4 | …. | Cluster 75 | TOTAL |
| --- | --- | --- | --- | --- | --- | --- | --- |
| Mask 1 | 100 | 50 | 25 | 20 | …. | 75 | 560 |
| Mask 2 | 80 | 50 | 35 | 25 | …. | 25 | 440 |
| Mask 3 | 20 | 50 | 75 | 80 | …. | 89 | 605 |
| Mask 4 | 78 | 91 | 55 | 36 | …. | 51 | 521 |
| … | … | … | … | … | ….. | … | … |

(B)

| NORMALIZATION | Cluster 1 | Cluster 2 | Cluster 3 | Cluster 4 | …. | Cluster 75 | TOTAL |
| --- | --- | --- | --- | --- | --- | --- | --- |
| Mask 1 | 0,18 | 0,09 | 0,04 | 0,04 | …. | 0,13 | 1,00 |
| Mask 2 | 0,18 | 0,11 | 0,08 | 0,06 | …. | 0,06 | 1,00 |
| Mask 3 | 0,03 | 0,08 | 0,12 | 0,13 | …. | 0,15 | 1,00 |
| Mask 4 | 0,15 | 0,17 | 0,11 | 0,07 | …. | 0,10 | 1,00 |
| … | … | … | … | … | …. | … | … |
